# Supplementary material for: Facilitators and Barriers to Implementing the 4Ms Framework of Age-Friendly Health Systems: A Scoping Review
Source: MDPI journal article supplement (doi:10.3390/nursrep14020070), 2024-04-15
Supplement: s1 [file s1]

**Supplemental Table S1.** Critical appraisal of the included analytical cross-sectional studies using the Joanna Briggs Institute critical appraisal tools for study designs.

|   | Analytical cross-sectional study                                         | Adler-Minstein et al., 2020 <sup>13</sup> | Lesser et al., 2022 <sup>23</sup> | Dolansky et al., 2021 <sup>18</sup> | Morgan et al., 2022 <sup>20</sup> | Lynch et al., 2021 <sup>19</sup> |
|---|--------------------------------------------------------------------------|-------------------------------------------|-----------------------------------|-------------------------------------|-----------------------------------|----------------------------------|
| 1 | Were the criteria for inclusion in the sample clearly defined?           | Y                                         | Y                                 | Y                                   | Y                                 | Y                                |
| 2 | Were the study subjects and the setting described in detail?             | Y                                         | Y                                 | Y                                   | Y                                 | Y                                |
| 3 | Was the exposure measured in a valid and reliable way?                   | Y                                         | Y                                 | U                                   | Y                                 | Y                                |
| 4 | Were objective, standard criteria used for measurement of the condition? | Y                                         | Y                                 | Y                                   | Y                                 | Y                                |
| 5 | Were confounding factors identified?                                     | NA                                        | NA                                | U                                   | NA                                | NA                               |
| 6 | Were strategies to deal with confounding factors stated?                 | NA                                        | NA                                | U                                   | NA                                | NA                               |
| 7 | Were the outcomes measured in a valid and reliable way?                  | Y                                         | Y                                 | Y                                   | Y                                 | NA                               |
| 8 | Was appropriate statistical analysis used?                               | Y                                         | Y                                 | U                                   | Y                                 | Y                                |

Key: Y= Yes; N=No; U=Unclear; NA=Not applicable; EHR = Electronic Health Record.

**Supplemental Table S2.** Critical appraisal of the included qualitative research using the Joanna Briggs Institute critical appraisal tools for study designs.

|    | <b>Qualitative research</b>                                                                                                                     | <b>Adler-Milstein et al., 2023<sup>4</sup></b> | <b>Gettel et al., 2022<sup>24</sup></b> | <b>Greenberg et al., 2022<sup>22</sup></b> |
|----|-------------------------------------------------------------------------------------------------------------------------------------------------|------------------------------------------------|-----------------------------------------|--------------------------------------------|
| 1  | Is there congruity between the stated philosophical perspective and the research methodology?                                                   | Y                                              | Y                                       | Y                                          |
| 2  | Is there congruity between the research methodology and the research question or objectives?                                                    | Y                                              | Y                                       | Y                                          |
| 3  | Is there congruity between the research methodology and the methods used to collect data?                                                       | Y                                              | Y                                       | Y                                          |
| 4  | Is there congruity between the research methodology and the representation and analysis of data?                                                | Y                                              | Y                                       | Y                                          |
| 5  | Is there congruity between the research methodology and the interpretation of results?                                                          | Y                                              | Y                                       | Y                                          |
| 6  | Is there a statement locating the researcher culturally or theoretically?                                                                       | Y                                              | Y                                       | NA                                         |
| 7  | Is the influence of the researcher on the research, and vice-versa, addressed?                                                                  | N                                              | Y                                       | Y                                          |
| 8  | Are participants, and their voices, adequately represented?                                                                                     | Y                                              | Y                                       | Y                                          |
| 9  | Is the research ethical according to current criteria or, for recent studies, and is there evidence of ethical approval by an appropriate body? | Y                                              | Y                                       | Y                                          |
| 10 | Do the conclusions drawn in the research report flow from the analysis, or interpretation, of the data?                                         | Y                                              | Y                                       | Y                                          |

Key: Y= Yes; N=No; U=Unclear; NA=Not applicable.

**Supplemental Table S3.** Critical appraisal of the included systematic reviews and research syntheses using the Joanna Briggs Institute critical appraisal tools for study designs.

|    | <b>Systematic reviews and research syntheses</b>                                | <b>Wang et al., 2023<sup>30</sup></b> | <b>Winterton et al., 2021<sup>14</sup></b> |
|----|---------------------------------------------------------------------------------|---------------------------------------|--------------------------------------------|
| 1  | Is the review question clearly and explicitly stated?                           | Y                                     | Y                                          |
| 2  | Were the inclusion criteria appropriate for the review question?                | Y                                     | Y                                          |
| 3  | Was the search strategy appropriate?                                            | Y                                     | Y                                          |
| 4  | Were the sources and resources used to search for studies adequate?             | Y                                     | Y                                          |
| 5  | Were the criteria for appraising studies appropriate?                           | Y                                     | Y                                          |
| 6  | Was critical appraisal conducted by two or more reviewers independently?        | Y                                     | Y                                          |
| 7  | Were there methods to minimize errors in data extraction?                       | Y                                     | Y                                          |
| 8  | Were the methods used to combine studies appropriate?                           | Y                                     | Y                                          |
| 9  | Was the likelihood of publication bias assessed?                                | Y                                     | Y                                          |
| 10 | Were recommendations for policy and/or practice supported by the reported data? | Y                                     | Y                                          |
| 11 | Were the specific directives for new research appropriate?                      | Y                                     | Y                                          |

Key: Y= Yes; N=No; U=Unclear; NA=Not applicable.

**Supplemental Table S4.** Critical appraisal of the included studies reporting prevalence data using the Joanna Briggs Institute critical appraisal tools for study designs.

|   | <b>Studies reporting prevalence data</b>                                                     | <b>Lundy et al., 2021<sup>17</sup></b> |
|---|----------------------------------------------------------------------------------------------|----------------------------------------|
| 1 | Was the sample frame appropriate to address the target population?                           | Y                                      |
| 2 | Were study participants sampled in an appropriate way?                                       | Y                                      |
| 3 | Was the sample size adequate?                                                                | Y                                      |
| 4 | Were the study subjects and the setting described in detail?                                 | Y                                      |
| 5 | Was the data analysis conducted with sufficient coverage of the identified sample?           | Y                                      |
| 6 | Were valid methods used for the identification of the condition?                             | Y                                      |
| 7 | Was the condition measured in a standard, reliable way for all participants?                 | Y                                      |
| 8 | Was there appropriate statistical analysis?                                                  | Y                                      |
| 9 | Was the response rate adequate, and if not, was the low response rate managed appropriately? |                                        |

Key: Y= Yes; N=No; U=Unclear; NA=Not applicable.

**Supplemental Table S5.** Critical appraisal of the included studies reporting prevalence data using the Joanna Briggs Institute critical appraisal tools for study designs.

|   | Quasi-experimental studies                                                                                                               | Berish et al., 2023 <sup>26</sup> | Breda et al., 2023 <sup>27</sup> | Casey et al., 2020 <sup>15</sup> | Guth et al., 2020 <sup>16</sup>  | Kuntz et al., 2023 <sup>28</sup> | McQuown et al., 2023 <sup>29</sup> | Severance et al., 2022 <sup>25</sup>     | Shen et al., 2022 <sup>21</sup> |
|---|------------------------------------------------------------------------------------------------------------------------------------------|-----------------------------------|----------------------------------|----------------------------------|----------------------------------|----------------------------------|------------------------------------|------------------------------------------|---------------------------------|
| 1 | Is it clear in the study what is the 'cause' and what is the 'effect' (i.e., there is no confusion about which variable comes first)?    | Y                                 | Y                                | Y                                | Y                                | Y                                | Y                                  | Y                                        | Y                               |
| 2 | Were the participants included in any comparisons similar?                                                                               | Y                                 | Y                                | Y                                | Y                                | Y                                | Y                                  | Y                                        | Y                               |
| 3 | Were the participants included in any comparisons receiving similar treatment/care, other than the exposure or intervention of interest? | Y                                 | Y                                | Y                                | Y                                | Y                                | Y                                  | Y                                        | Y                               |
| 4 | Was there a control group?                                                                                                               | Y                                 | Y                                | Y: a pre-postintervention design   | Y: targeted areas vs. non-targeted areas | Y                               |
| 5 | Were there multiple measurements of the outcome both pre and post the intervention/exposure?                                             | Y                                 | Y                                | Y                                | Y                                | Y                                | Y                                  | Y                                        | Y                               |
| 6 | Was follow up complete and if not, were differences between groups in terms of their follow up adequately described and analyzed?        | Y                                 | Y                                | Y                                | Y                                | Y                                | Y                                  | Y                                        | Y                               |
| 7 | Were the outcomes of participants included in any comparisons measured in the same way?                                                  | Y                                 | Y                                | Y                                | Y                                | Y                                | Y                                  | Y                                        | Y                               |
| 8 | Were outcomes measured in a reliable way?                                                                                                | Y                                 | Y                                | Y                                | Y                                | Y                                | Y                                  | Y                                        | Y                               |
| 9 | Was appropriate statistical analysis used?                                                                                               | Y                                 | Y                                | Y                                | Y                                | Y                                | Y                                  | Y                                        | Y                               |

Key: Y= Yes; N=No; U=Unclear; NA=Not applicable.
